# Supplementary material
Source: ML conference proceedings conference paper supplement (https://openreview.net/forum?id=AIqC7F7xV-d)
Supplement: supplementary_material [file attachment]

---

# Learning Unified Representations for Multi-Resolution Face Recognition

## - Supplementary Materials -

---

Anonymous Author(s)

Affiliation

Address

email

## 1 A Appendix

### 2 A.1 Theoretical Derivation of Up-sampling Error

3 Here, we take bilinear interpolation, a typical image interpolation method, as an example to analyze the  
4 relationship between the interpolation error and the resolution of a face image. Bilinear interpolation  
5 can be considered as a bivariate Lagrange interpolation problem containing two interpolation nodes  
6 in each of the two dimensions.

7 Let  $D$  be a unit-bounded closed region in a two-dimensional image space, and  
8  $Q_1(x_0, y_0), Q_2(x_1, y_0), Q_3(x_0, y_1), Q_4(x_1, y_1) \in D$  be four adjacent pixel points in this region.  
9 We use an interpolation polynomial  $P(x, y)$  for the interpolation approximation of the bivariate  
10 continuous function  $f(x, y)$  defined on  $D$ , and the interpolation error  $E(x, y)$  can be expressed as

$$E(x, y) = f(x, y) - P(x, y) \quad (1)$$

11 which indicates the potential error information introduced to the recognition of different identities.  
12 According to the the Rolle's theorem, we can obtain

$$E(x, y) = \frac{\partial^4 f(\xi, \eta)}{\partial x^2 \partial y^2} \omega_2(x) \mu_2(y) \quad (2)$$

13 where  $\xi, \eta$  is an interior point of  $D$  and

$$\omega_2(x) = (x - x_0)(x - x_1) \quad (3)$$

$$\mu_2(y) = (y - y_0)(y - y_1) \quad (4)$$

14 As  $x_1 - x_0 = y_1 - y_0 = 1$  for adjacent pixel points, we can get the upper bound of  $|\omega_2(x)|$  and  
15  $|\mu_2(y)|$

$$|\omega_2(x)| < \frac{1}{4}, |\mu_2(y)| < \frac{1}{4} \quad (5)$$

16 Thus, the error estimation can be expressed as

Table 1: Comparison of different training methods for our BTNet. “Acc.” denotes average 1:1 verification accuracy. “# Params.” indicates the amount of parameter storage for the branch network  $B_{14}$ .

| Training method                                     | Acc. (%) |       | # Params. (M) |
|-----------------------------------------------------|----------|-------|---------------|
|                                                     | 112&14   | 14&14 |               |
| Scratch                                             | 49.90    | 78.00 | 43.59         |
| Pretraining                                         | 78.05    | 76.87 | 43.59         |
| Pretraining + BCT                                   | 85.90    | 78.04 | 43.59         |
| Pretraining + BCT + Fix Trunk                       | 85.07    | 77.22 | 2.29          |
| Pretraining + BCT + Fix Trunk + Branch Distillation | 94.08    | 90.90 | 2.29          |

$$E(x, y) \leq \frac{|\frac{\partial^4 f(\xi, \eta)}{\partial x^2 \partial y^2}|}{64} \quad (6)$$

where  $\frac{\partial^4 f(\xi, \eta)}{\partial x^2 \partial y^2}$  can be approximated using the difference operator

$$\begin{bmatrix} 1 & -2 & 1 \\ -2 & 4 & -2 \\ 1 & -2 & 1 \end{bmatrix} \quad (7)$$

Based on the above theoretical analysis, we can experimentally study the relationship between the estimated up-sampling error and the image resolution.

## A.2 Instantiation of BTNet-res50

We provide the detailed architecture of BTNet-res50 ( $\varphi_{bt}$ ), an instantiation of BTNet framework based on ResNet50 [1]. Our method can be easily implemented by refining a network with the top-down hierarchical representation structure.

## A.3 Ablation Study

In all these experiments, we report the average verification results on six benchmarks in 112&14 and 14&14 matching, representing cross-resolution and same-resolution performance respectively.

**Training Method Alternatives.** Here, we experimentally compare different training methods: (1) Scratch: train without pretrained trunk parameters. (2) Pretraining: initialize the backbone and classifier with the pretrained trunk network. (3) Backward-compatible training (BCT, [2]): fix parameters of the old classifier. (4) Fix-trunk: fix parameters of the trunk subnet  $T_r$ . (5) Branch distillation: use L2-distance to obtain the loss between the intermediate feature maps at the coupling layer of the pretrained trunk  $T$  and the branch  $B_r$ .

We compare different training method combinations in Table 1 and find that both pretraining and BCT succeeded in ensuring representation compatibility. Among these two, BCT performs better since it imposes a stricter constraint during training. Furthermore, we are able to observe that branch distillation is crucial for improving the discriminative power by transferring high-resolution information to low-resolution branches.

**Where should we have resolution-specific layers?** We conducted an ablation to see the effects of different specific-shared layer allocation strategies. The experiment was done with different trunk layers (i.e., the parameters of these layers are inherited from the pretrained trunk without updating). Figure 2 shows the results. We find that increasing the number of branch layers (i.e., specific layers for different resolutions) will lead to better performance due to increased flexibility. Our specific-shared layer allocation of BTNet can achieve better parameter/accuracy tradeoffs. Since further increasing the number of trunk layers based on BTNet cannot lead to significantly better performance but

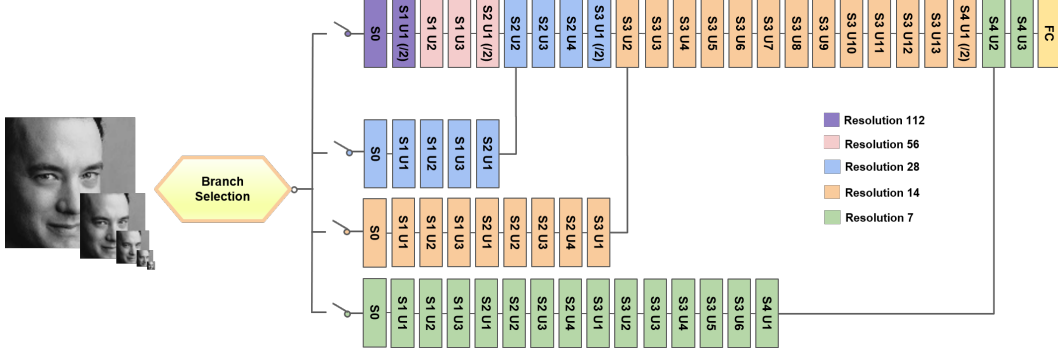

Figure 1: Detailed architecture of BTNet-res50 ( $\varphi_{bt}$ ). Note that ‘S’ and ‘U’ represent stage and unit respectively, and ‘/2’ means down-sampling by convolution with stride 2.

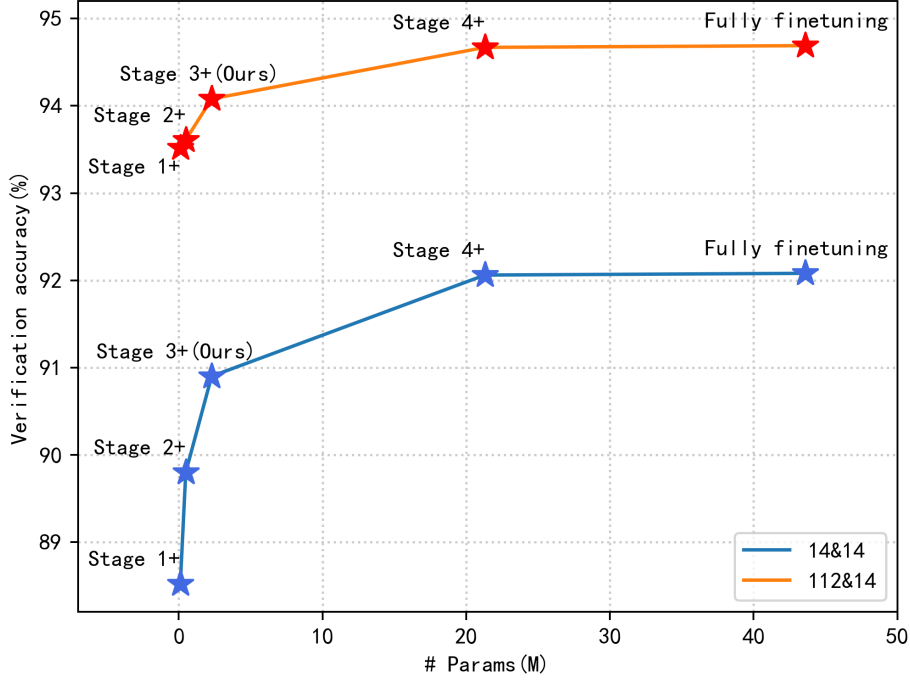

Figure 2: Comparison of verification accuracy and the amount of stored parameters for different specific-shared layer allocation strategies. Note that “Stage x+” indicates that layers deeper than “Stage x, Unit 1” are inherited from the pretrained trunk without updating.

increases parameter storage cost by a large margin, we use resolution-specific layers as shown in Figure 1.

#### A.4 Visualization

To interpret the behavior of learning compatible and discriminative representations, we visualize the intermediate feature maps in Figure 3. We find that  $\varphi_{hr}$  introduces the noise information while  $\varphi_{mm}$  has more discriminative but resolution-variant feature maps. The feature maps of  $\varphi_{mr}$  tend to be smoother, diminishing the error information, but the discriminability could be limited as high-frequency details benefit recognition [3].

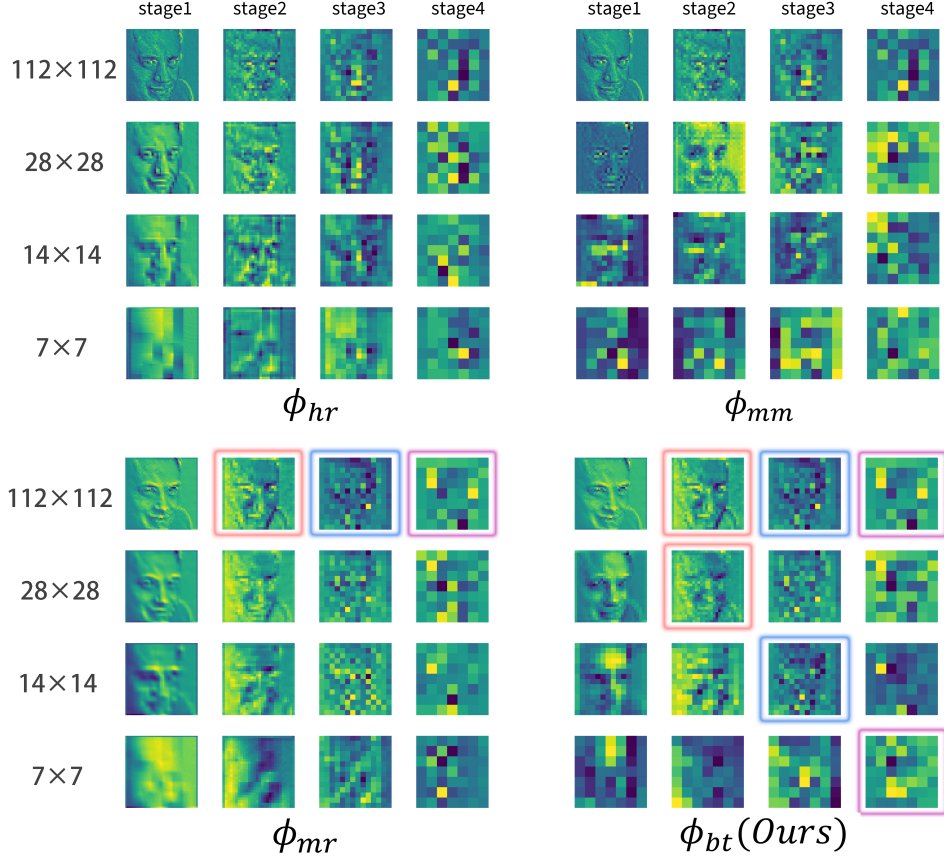

Figure 3: Visualization of intermediate feature maps for inputs with different resolutions. We show the feature maps located at output layers of BNets, denoted as stage1/2/3/4 respectively. We see our method can transfer multi-resolution visual inputs to intermediate feature maps at corresponding layers (indicated by bounding boxes of the same color) of TNet.

We also show that through the resolution-specific feature transfer of multiple branches,  $\varphi_{bt}$  can encourage the transferred features to be aligned before fed into the trunk network in corresponding layers. For instance, at stage 2, the feature maps of  $\varphi_{bt}$  with input resolution 112 and 28 are more similar than those of  $\varphi_{hr}$ ,  $\varphi_{mm}$ ,  $\varphi_{mr}$ . Furthermore, more detailed information can be found in the feature maps of  $\varphi_{bt}$  with input resolution 28 compared to  $\varphi_{mr}$ . This inspiring phenomenon suggests that BNet can learn compatible representations while improving the discriminability in low-resolution domain through the knowledge transferred from high-resolution visual signals.

## A.5 Additional Experimental Results

**Multi-Resolution Identity Matching.** We report the detailed results for 1:1 verification on each dataset (i.e., LFW, CFP-FF, CFP-FP, AgeDB-30, CALFW and CPLFW). The relative drop of  $\varphi_{bt}$  in high-resolution setting (i.e., 112&112) becomes almost negligible compared to the improvement for all the other settings which incorporate low-resolution inputs.

**Multi-Resolution Feature Aggregation.** We report the detailed results on the IJB-C dataset, including TAR at different FAR (see Table 3, 4), ROC Curve (see Figure 4, 5) for 1:1 verification, and TPIR at FPIR=0.01, Top-1, Top-5, Top-10 accuracy (see Table 6, 7) for 1:N identification. We are able to observe that  $\varphi_{bt}$  can be comparable to or serve as the paradigm model (i.e., model with the best performance) in each resolution setting, both for identity matching and feature aggregation.

Table 2: Detailed cross-resolution 1:1 verification accuracy (mean $\pm$ std over 5 trails) per-benchmark.

|        |          | $\varphi_{hr}$ | $\varphi_{mm}$ | $\varphi_{mr}$                 | $\varphi_{bt}$ (Ours)          |
|--------|----------|----------------|----------------|--------------------------------|--------------------------------|
| 112&7  | LFW      | 63.0 $\pm$ 2.0 | 51.5 $\pm$ 2.6 | 77.4 $\pm$ 1.4                 | <b>96.1<math>\pm</math>0.7</b> |
|        | CFP-FF   | 56.2 $\pm$ 1.2 | 51.2 $\pm$ 2.0 | 64.7 $\pm$ 2.0                 | <b>90.9<math>\pm</math>1.3</b> |
|        | CFP-FP   | 54.9 $\pm$ 1.3 | 49.8 $\pm$ 1.6 | 60.8 $\pm$ 2.5                 | <b>80.2<math>\pm</math>2.3</b> |
|        | AgeDB-30 | 57.3 $\pm$ 1.6 | 50.0 $\pm$ 1.4 | 60.5 $\pm$ 2.0                 | <b>79.8<math>\pm</math>2.3</b> |
|        | CALFW    | 58.5 $\pm$ 1.7 | 51.2 $\pm$ 1.6 | 66.1 $\pm$ 1.8                 | <b>87.8<math>\pm</math>1.7</b> |
|        | CPLFW    | 56.6 $\pm$ 1.6 | 49.8 $\pm$ 1.5 | 65.6 $\pm$ 1.3                 | <b>81.8<math>\pm</math>1.3</b> |
| 112&14 | LFW      | 91.0 $\pm$ 1.2 | 49.1 $\pm$ 1.3 | 96.9 $\pm$ 0.6                 | <b>99.4<math>\pm</math>0.3</b> |
|        | CFP-FF   | 81.7 $\pm$ 1.7 | 50.0 $\pm$ 1.5 | 90.4 $\pm$ 1.0                 | <b>98.2<math>\pm</math>0.4</b> |
|        | CFP-FP   | 75.5 $\pm$ 1.4 | 50.2 $\pm$ 2.0 | 82.3 $\pm$ 1.8                 | <b>92.6<math>\pm</math>1.2</b> |
|        | AgeDB-30 | 76.9 $\pm$ 1.5 | 51.3 $\pm$ 1.8 | 82.7 $\pm$ 1.1                 | <b>91.3<math>\pm</math>1.2</b> |
|        | CALFW    | 81.8 $\pm$ 1.0 | 49.7 $\pm$ 1.5 | 88.0 $\pm$ 0.8                 | <b>93.9<math>\pm</math>1.1</b> |
|        | CPLFW    | 79.2 $\pm$ 1.3 | 49.1 $\pm$ 1.4 | 84.5 $\pm$ 1.4                 | <b>89.1<math>\pm</math>1.7</b> |
| 112&28 | LFW      | 99.5 $\pm$ 0.3 | 48.9 $\pm$ 1.1 | <b>99.7<math>\pm</math>0.2</b> | <b>99.7<math>\pm</math>0.2</b> |
|        | CFP-FF   | 99.0 $\pm$ 0.3 | 51.5 $\pm$ 1.8 | 99.5 $\pm$ 0.3                 | <b>99.7<math>\pm</math>0.2</b> |
|        | CFP-FP   | 94.9 $\pm$ 1.1 | 49.4 $\pm$ 2.0 | 95.4 $\pm$ 0.8                 | <b>97.0<math>\pm</math>0.5</b> |
|        | AgeDB-30 | 95.7 $\pm$ 1.0 | 49.5 $\pm$ 0.7 | 95.5 $\pm$ 1.1                 | <b>96.3<math>\pm</math>1.1</b> |
|        | CALFW    | 95.0 $\pm$ 1.0 | 50.6 $\pm$ 0.7 | 94.9 $\pm$ 1.0                 | <b>95.5<math>\pm</math>1.0</b> |
|        | CPLFW    | 91.3 $\pm$ 1.2 | 50.3 $\pm$ 1.2 | 91.3 $\pm$ 1.2                 | <b>91.7<math>\pm</math>1.0</b> |

Table 3: Detailed same-resolution 1:1 verification accuracy (mean $\pm$ std over 5 trails) per-benchmark.

|         |          | $\varphi_{hr}$                 | $\varphi_{mm}$                 | $\varphi_{mr}$                 | $\varphi_{bt}$ (Ours)          |
|---------|----------|--------------------------------|--------------------------------|--------------------------------|--------------------------------|
| 7&7     | LFW      | 70.8 $\pm$ 2.9                 | 74.0 $\pm$ 1.5                 | 72.5 $\pm$ 1.8                 | <b>92.7<math>\pm</math>1.2</b> |
|         | CFP-FF   | 67.4 $\pm$ 2.3                 | 69.4 $\pm$ 1.7                 | 67.7 $\pm$ 1.4                 | <b>86.1<math>\pm</math>1.5</b> |
|         | CFP-FP   | 57.1 $\pm$ 2.3                 | 59.1 $\pm$ 2.3                 | 56.5 $\pm$ 1.3                 | <b>73.8<math>\pm</math>1.4</b> |
|         | AgeDB-30 | 54.3 $\pm$ 1.9                 | 54.2 $\pm$ 2.2                 | 53.5 $\pm$ 1.8                 | <b>62.5<math>\pm</math>2.2</b> |
|         | CALFW    | 58.2 $\pm$ 1.0                 | 60.1 $\pm$ 1.3                 | 59.2 $\pm$ 2.1                 | <b>76.0<math>\pm</math>1.5</b> |
|         | CPLFW    | 56.4 $\pm$ 1.7                 | 58.6 $\pm$ 1.2                 | 56.7 $\pm$ 1.1                 | <b>75.6<math>\pm</math>1.5</b> |
| 14&14   | LFW      | 87.9 $\pm$ 0.9                 | 93.4 $\pm$ 1.2                 | 94.8 $\pm$ 0.9                 | <b>98.5<math>\pm</math>0.5</b> |
|         | CFP-FF   | 79.0 $\pm$ 2.2                 | 84.7 $\pm$ 1.6                 | 86.7 $\pm$ 1.6                 | <b>96.2<math>\pm</math>0.7</b> |
|         | CFP-FP   | 68.2 $\pm$ 1.5                 | 73.7 $\pm$ 2.0                 | 78.0 $\pm$ 1.5                 | <b>89.0<math>\pm</math>1.0</b> |
|         | AgeDB-30 | 64.1 $\pm$ 1.7                 | 64.2 $\pm$ 2.4                 | 65.9 $\pm$ 2.3                 | <b>84.2<math>\pm</math>1.6</b> |
|         | CALFW    | 71.8 $\pm$ 0.9                 | 75.6 $\pm$ 1.3                 | 77.5 $\pm$ 1.4                 | <b>89.9<math>\pm</math>0.7</b> |
|         | CPLFW    | 72.3 $\pm$ 1.6                 | 76.4 $\pm$ 1.8                 | 79.0 $\pm$ 1.7                 | <b>87.6<math>\pm</math>1.9</b> |
| 28&28   | LFW      | 99.1 $\pm$ 0.4                 | 99.6 $\pm$ 0.6                 | 99.6 $\pm$ 0.3                 | <b>99.8<math>\pm</math>0.3</b> |
|         | CFP-FF   | 97.2 $\pm$ 0.7                 | 98.4 $\pm$ 0.7                 | 99.1 $\pm$ 0.4                 | <b>99.4<math>\pm</math>0.3</b> |
|         | CFP-FP   | 91.9 $\pm$ 1.3                 | 93.5 $\pm$ 1.3                 | 95.0 $\pm$ 1.0                 | <b>96.8<math>\pm</math>0.9</b> |
|         | AgeDB-30 | 90.9 $\pm$ 1.2                 | 92.6 $\pm$ 0.8                 | 92.4 $\pm$ 1.0                 | <b>94.9<math>\pm</math>1.1</b> |
|         | CALFW    | 92.9 $\pm$ 1.3                 | 93.4 $\pm$ 0.9                 | 93.9 $\pm$ 1.3                 | <b>95.0<math>\pm</math>0.9</b> |
|         | CPLFW    | 89.5 $\pm$ 1.3                 | 90.6 $\pm$ 1.2                 | 90.7 $\pm$ 1.3                 | <b>91.7<math>\pm</math>0.9</b> |
| 112&112 | LFW      | <b>99.8<math>\pm</math>0.2</b> | <b>99.8<math>\pm</math>0.2</b> | <b>99.8<math>\pm</math>0.2</b> | <b>99.8<math>\pm</math>0.2</b> |
|         | CFP-FF   | <b>99.9<math>\pm</math>0.1</b> | <b>99.9<math>\pm</math>0.1</b> | 99.8 $\pm$ 0.2                 | 99.8 $\pm$ 0.2                 |
|         | CFP-FP   | <b>98.9<math>\pm</math>0.3</b> | <b>98.9<math>\pm</math>0.3</b> | 98.1 $\pm$ 0.4                 | 98.1 $\pm$ 0.4                 |
|         | AgeDB-30 | <b>98.4<math>\pm</math>0.7</b> | <b>98.4<math>\pm</math>0.7</b> | 97.2 $\pm$ 0.8                 | 97.2 $\pm$ 0.8                 |
|         | CALFW    | <b>96.0<math>\pm</math>1.2</b> | <b>96.0<math>\pm</math>1.2</b> | 95.9 $\pm$ 1.0                 | 95.9 $\pm$ 1.0                 |
|         | CPLFW    | <b>93.1<math>\pm</math>1.3</b> | <b>93.1<math>\pm</math>1.3</b> | 92.7 $\pm$ 1.0                 | 92.7 $\pm$ 1.0                 |

Table 4: 1:1 verification TAR at different FAR on the IJB-C dataset for cross-resolution feature aggregation.

|                       | 112&7            |                  |                  |                  |                  |                  | 112&14           |                  |                  |                  |                  |                  | 112&28           |                  |                  |
|-----------------------|------------------|------------------|------------------|------------------|------------------|------------------|------------------|------------------|------------------|------------------|------------------|------------------|------------------|------------------|------------------|
| FAR                   | 10 <sup>-6</sup> | 10 <sup>-5</sup> | 10 <sup>-3</sup> | 10 <sup>-2</sup> | 10 <sup>-1</sup> | 10 <sup>-6</sup> | 10 <sup>-5</sup> | 10 <sup>-3</sup> | 10 <sup>-2</sup> | 10 <sup>-1</sup> | 10 <sup>-6</sup> | 10 <sup>-5</sup> | 10 <sup>-3</sup> | 10 <sup>-2</sup> | 10 <sup>-1</sup> |
| $\varphi_{hr}$        | <b>67.99</b>     | <b>81.65</b>     | 93.18            | 96.38            | 98.65            | 78.83            | 87.44            | 95.86            | 97.79            | 99.05            | <b>88.87</b>     | <b>92.56</b>     | 97.19            | 98.33            | 99.06            |
| $\varphi_{mm}$        | 53.57            | 64.34            | 84.01            | 91.96            | 97.12            | <b>83.22</b>     | <b>89.56</b>     | 96.10            | 97.71            | 98.82            | 86.84            | 92.33            | 97.16            | 98.10            | 99.01            |
| $\varphi_{mr}$        | 37.83            | 49.12            | 76.80            | 88.32            | 95.79            | 77.97            | 85.46            | 95.64            | 97.79            | 99.21            | 85.55            | 91.86            | 97.25            | 98.46            | 99.19            |
| $\varphi_{bt}$ (Ours) | 66.84            | 78.40            | <b>94.27</b>     | <b>97.63</b>     | <b>99.16</b>     | 81.92            | 88.38            | <b>96.64</b>     | <b>98.34</b>     | <b>99.28</b>     | 86.61            | 92.48            | <b>97.38</b>     | <b>98.47</b>     | <b>99.20</b>     |

Table 5: 1:1 verification TAR at different FAR on the IJB-C dataset for same-resolution feature aggregation.

|                       | 7&7          |              |              |              |              | 14&14        |              |              |              |              | 28&28        |              |              |              |              | 112&112      |              |              |              |              |
|-----------------------|--------------|--------------|--------------|--------------|--------------|--------------|--------------|--------------|--------------|--------------|--------------|--------------|--------------|--------------|--------------|--------------|--------------|--------------|--------------|--------------|
| FAR                   | $10^{-6}$    | $10^{-5}$    | $10^{-3}$    | $10^{-2}$    | $10^{-1}$    | $10^{-6}$    | $10^{-5}$    | $10^{-3}$    | $10^{-2}$    | $10^{-1}$    | $10^{-6}$    | $10^{-5}$    | $10^{-3}$    | $10^{-2}$    | $10^{-1}$    | $10^{-6}$    | $10^{-5}$    | $10^{-3}$    | $10^{-2}$    | $10^{-1}$    |
| $\varphi_{hr}$        | 0.69         | 1.73         | 12.58        | 27.63        | 56.81        | 9.82         | 20.38        | 52.57        | 72.61        | 90.30        | 75.67        | 83.24        | 94.21        | 97.15        | 98.74        | <b>89.58</b> | <b>94.51</b> | <b>97.57</b> | 98.40        | 99.06        |
| $\varphi_{mm}$        | 0.68         | 1.73         | 11.93        | 27.48        | 56.84        | 7.59         | 15.61        | 48.28        | 71.13        | 91.04        | 73.68        | 85.14        | 95.82        | 97.65        | 98.89        | <b>89.58</b> | <b>94.51</b> | <b>97.57</b> | 98.40        | 99.06        |
| $\varphi_{mr}$        | 0.74         | 1.76         | 11.11        | 25.98        | 54.26        | 14.21        | 24.72        | 60.39        | 79.84        | 94.35        | 78.91        | 86.42        | 96.04        | 98.07        | 99.09        | 88.48        | 93.37        | 97.50        | <b>98.51</b> | <b>99.23</b> |
| $\varphi_{bt}$ (Ours) | <b>12.09</b> | <b>20.70</b> | <b>57.17</b> | <b>79.02</b> | <b>93.90</b> | <b>57.75</b> | <b>70.63</b> | <b>90.85</b> | <b>96.06</b> | <b>98.68</b> | <b>82.85</b> | <b>90.32</b> | <b>96.94</b> | <b>98.31</b> | <b>99.15</b> | 88.48        | 93.37        | 97.50        | <b>98.51</b> | <b>99.23</b> |

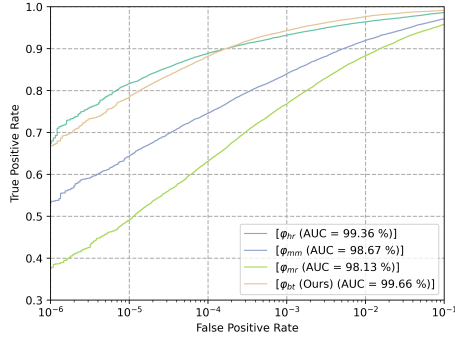

(a) 112&7

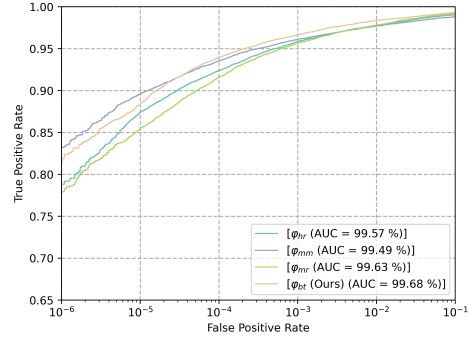

(b) 112&14

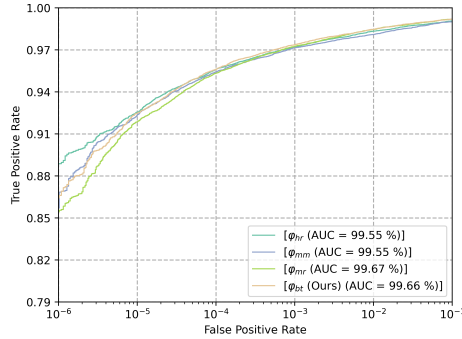

(c) 112&28

Figure 4: 1:1 verification ROC Curve on the IJB-C dataset for cross-resolution feature aggregation.

Table 6: 1: N identification TPIR(%@FPIR=0.01), Top-1, Top-5, Top-10 accuracy on the IJB-C dataset for cross-resolution feature aggregation.

|                       | 112&7        |              |              |              | 112&14       |              |              |              | 112&28       |              |              |              |
|-----------------------|--------------|--------------|--------------|--------------|--------------|--------------|--------------|--------------|--------------|--------------|--------------|--------------|
|                       | TPIR         | Top-1        | Top-5        | Top-10       | TPIR         | Top-1        | Top-5        | Top-10       | TPIR         | Top-1        | Top-5        | Top-10       |
| $\varphi_{hr}$        | <b>75.35</b> | <b>92.76</b> | <b>95.14</b> | <b>95.92</b> | 81.98        | 93.89        | 96.25        | 96.98        | <b>90.42</b> | 96.05        | <b>97.47</b> | 97.80        |
| $\varphi_{mm}$        | 59.07        | 88.89        | 92.33        | 93.35        | <b>86.39</b> | <b>95.15</b> | <b>96.86</b> | 97.31        | 90.04        | 96.00        | 97.31        | 97.72        |
| $\varphi_{mr}$        | 43.89        | 82.29        | 87.74        | 89.42        | 82.18        | 93.87        | 96.20        | 96.89        | 88.90        | 95.93        | 97.36        | 97.84        |
| $\varphi_{bt}$ (Ours) | 73.40        | 91.30        | 94.86        | 95.88        | 84.78        | 94.78        | 96.84        | <b>97.41</b> | 89.84        | <b>96.16</b> | 97.46        | <b>97.90</b> |

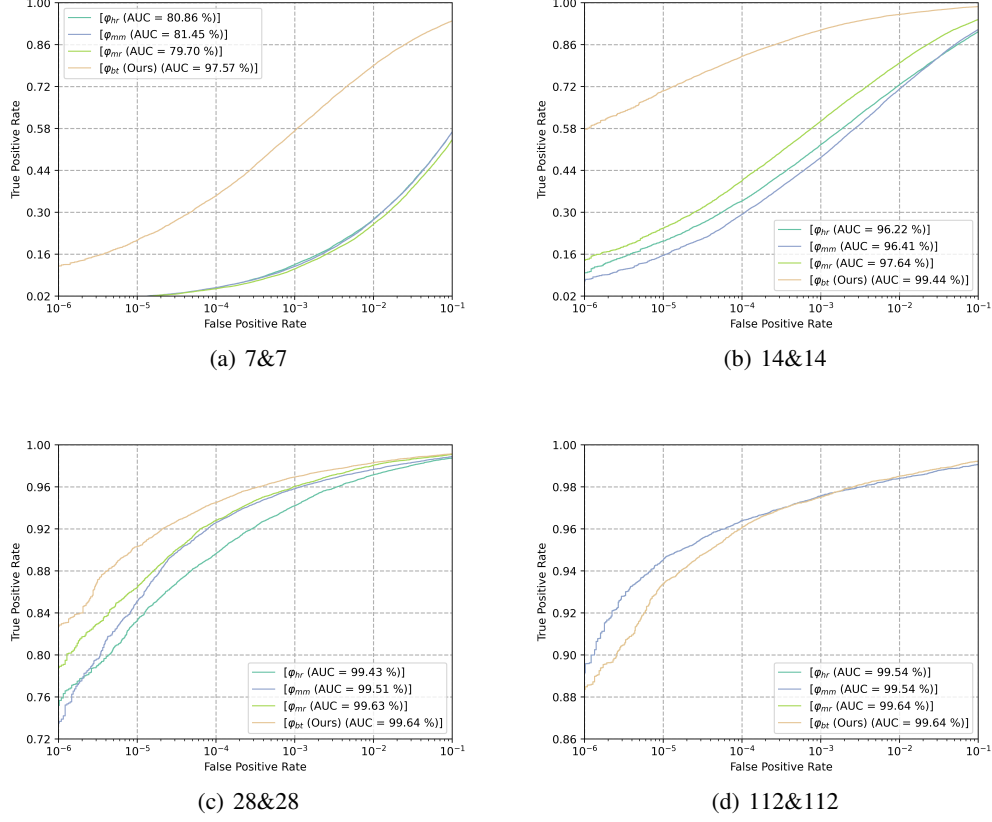

Figure 5: 1:1 verification ROC Curve on the IJB-C dataset for same-resolution feature aggregation.

Table 7: 1: N identification TPIR(%@FPIR=0.01), Top-1, Top-5, Top-10 accuracy on the IJB-C dataset for same-resolution feature aggregation.

|                             | 7&7          |              |              |              | 14&14        |              |              |              | 28&28        |              |              |              | 112&112      |              |              |              |
|-----------------------------|--------------|--------------|--------------|--------------|--------------|--------------|--------------|--------------|--------------|--------------|--------------|--------------|--------------|--------------|--------------|--------------|
|                             | TPIR         | Top-1        | Top-5        | Top-10       |
| $\varphi_{hr}$              | 1.20         | 11.77        | 19.95        | 24.28        | 15.16        | 50.96        | 63.62        | 68.68        | 77.52        | 91.62        | 94.95        | 95.99        | <b>92.66</b> | <b>96.58</b> | <b>97.71</b> | 97.94        |
| $\varphi_{mm}$              | 1.24         | 20.38        | 30.23        | 34.83        | 11.62        | 62.08        | 72.33        | 76.33        | 79.31        | 93.87        | 96.09        | 96.81        | <b>92.66</b> | <b>96.58</b> | <b>97.71</b> | 97.94        |
| $\varphi_{mr}$              | 1.36         | 17.41        | 26.53        | 31.03        | 23.72        | 68.64        | 78.38        | 81.99        | 83.82        | 94.53        | 96.67        | 97.33        | 90.89        | 96.44        | 97.65        | <b>98.00</b> |
| $\varphi_{bt}(\text{Ours})$ | <b>15.55</b> | <b>55.49</b> | <b>67.98</b> | <b>73.05</b> | <b>63.69</b> | <b>86.35</b> | <b>92.14</b> | <b>94.01</b> | <b>86.87</b> | <b>95.42</b> | <b>97.06</b> | <b>97.62</b> | 90.89        | 96.44        | 97.65        | <b>98.00</b> |

70 **References**

- 71 [1] Kaiming He, Xiangyu Zhang, Shaoqing Ren, and Jian Sun. Deep residual learning for image  
72 recognition. In *2016 IEEE Conference on Computer Vision and Pattern Recognition, CVPR 2016,*  
73 *Las Vegas, NV, USA, June 27-30, 2016*, pages 770–778. IEEE Computer Society, 2016.
- 74 [2] Yantao Shen, Yuanjun Xiong, Wei Xia, and Stefano Soatto. Towards backward-compatible  
75 representation learning. In *2020 IEEE/CVF Conference on Computer Vision and Pattern Recog-*  
76 *niton, CVPR 2020, Seattle, WA, USA, June 13-19, 2020*, pages 6367–6376. Computer Vision  
77 Foundation / IEEE, 2020.
- 78 [3] Haohan Wang, Xindi Wu, Zeyi Huang, and Eric P. Xing. High-frequency component helps  
79 explain the generalization of convolutional neural networks. In *2020 IEEE/CVF Conference on*  
80 *Computer Vision and Pattern Recognition, CVPR 2020, Seattle, WA, USA, June 13-19, 2020*,  
81 pages 8681–8691. Computer Vision Foundation / IEEE, 2020.
